# Supplementary material for: QTLs Related to Rice Callus Regeneration Ability: Localization and Effect Verification of qPRR3
Source: MDPI journal article supplement (doi:10.3390/cells11244125), 2022-12-19
Supplement: s1 [file s1]

**Table S1 Available InDel markers screened in *qPRR3***

| InDel     | InDel loc | InDel size | 9311 (—) | 182 | Nip (+) | Promter |         |    |                           |
|-----------|-----------|------------|----------|-----|---------|---------|---------|----|---------------------------|
|           |           |            |          |     |         | F/R     | loc     | TM | sequence                  |
| InDel 3-1 | 2756129   | 34         | 141      | +   | 175     | F       | 2756090 | 60 | AAAGGGACCCTAAAAGCGCC      |
|           |           |            |          |     |         | R       | 2756265 | 60 | CGTTTTATCCGGGGCGGCTA      |
| InDel 3-2 | 2799657   | 24         | 247      | +   | 271     | F       | 2799524 | 57 | GCTGTAACTGGTACTCCGTT      |
|           |           |            |          |     |         | R       | 2799795 | 57 | GCTAGCTAGCTAGTAGCATGG     |
| InDel 3-3 | 2811484   | 17         | 198      | +   | 181     | F       | 2811447 | 56 | CGTTCCAATTTCAACCGAACTTTT  |
|           |           |            |          |     |         | R       | 2811628 | 58 | TCAGATTCGTACGCCGTCAT      |
| InDel 3-4 | 2913200   | 41         | 206      | +   | 165     | F       | 2913158 | 54 | GTGTTGTGACAAAATCAATGATACC |
|           |           |            |          |     |         | R       | 2913323 | 58 | TACGGATTTATTGCCACCACCA    |
| InDel 3-5 | 2983799   | 31         | 225      | —   | 256     | F       | 2983724 | 58 | CACATGATCCTACTCAAAAAAG    |
|           |           |            |          |     |         | R       | 2983980 | 57 | CCATCCTACTAAAGTATCATATC   |

Five available InDel markers were screened in *qPRR3*.

**Table S2 The relative expression levels of all genes in *qPRR3* in parent and RILs**

| Gene ID        | CDS Coordinates<br>(5'-3') | relative expression |       |                                        | Gene Product Name                                                |
|----------------|----------------------------|---------------------|-------|----------------------------------------|------------------------------------------------------------------|
|                |                            | Nip                 | 93-11 | BC <sub>3</sub> F <sub>2</sub> -182-78 |                                                                  |
| LOC_Os03g05540 | 2757582 - 2762244          | 12.10               | 15.06 | 14.42                                  | tetratricopeptide repeat containing protein, putative, expressed |
| LOC_Os03g05550 | 2767839 - 2768531          | 0.37                | 0.00  | 0.24                                   | expressed protein                                                |
| LOC_Os03g05560 | 2772434 - 2771187          | 0.06                | 0.05  | 0.03                                   | zinc finger, C3HC4 type domain containing protein, expressed     |

---

|                |                   |        |        |       |                                                                       |
|----------------|-------------------|--------|--------|-------|-----------------------------------------------------------------------|
| LOC_Os03g05570 | 2777769 - 2776612 | 0.56   | 0.39   | 0.89  | RING-H2 finger protein ATL3F, putative, expressed                     |
| LOC_Os03g05580 | 2793544 - 2794224 | 0.00   | 0.00   | 0.01  | expressed protein                                                     |
| LOC_Os03g05590 | 2800290 - 2800924 | 0.13   | 0.05   | 0.00  | AP2 domain containing protein, expressed                              |
| LOC_Os03g05600 | 2802871 - 2803283 | 0.00   | 0.00   | 0.00  | hypothetical protein                                                  |
| LOC_Os03g05610 | 2804141 - 2805943 | 0.13   | 0.01   | 0.06  | inorganic phosphate transporter, putative, expressed                  |
| LOC_Os03g05620 | 2809678 - 2807555 | 18.12  | 22.22  | 25.70 | inorganic phosphate transporter, putative, expressed                  |
| LOC_Os03g05630 | 2811738 - 2814268 | 1.03   | 1.39   | 1.47  | expressed protein                                                     |
| LOC_Os03g05640 | 2817367 - 2815438 | 0.43   | 1.00   | 0.01  | inorganic phosphate transporter, putative, expressed                  |
| LOC_Os03g05650 | 2818997 - 2820125 | 0.05   | 0.01   | 0.03  | expressed protein                                                     |
| LOC_Os03g05660 | 2828096 - 2822929 | 5.67   | 15.55  | 8.63  | appr-1-p processing enzyme family protein, putative, expressed        |
| LOC_Os03g05680 | 2833133 - 2837273 | 15.88  | 11.21  | 17.82 | histone demethylase JARID1C, putative, expressed                      |
| LOC_Os03g05690 | 2838772 - 2841691 | 33.54  | 20.23  | 28.19 | ZOS3-03 - C2H2 zinc finger protein, expressed                         |
| LOC_Os03g05700 | 2842391 - 2841790 | 20.25  | 0.80   | 13.78 | expressed protein                                                     |
| LOC_Os03g05710 | 2844831 - 2843447 | 9.11   | 6.66   | 14.57 | acetyltransferase, GNAT family, putative, expressed                   |
| LOC_Os03g05720 | 2845709 - 2851689 | 44.64  | 44.02  | 45.36 | WD domain, G-beta repeat domain containing protein, expressed         |
| LOC_Os03g05730 | 2856682 - 2852293 | 102.40 | 122.74 | 97.05 | cell division control protein 48 homolog E, putative, expressed       |
| LOC_Os03g05740 | 2860232 - 2857125 | 11.95  | 11.64  | 10.97 | ras-related protein, putative, expressed                              |
| LOC_Os03g05750 | 2868242 - 2866315 | 22.15  | 8.74   | 22.87 | heavy-metal-associated domain-containing protein, putative, expressed |
| LOC_Os03g05760 | 2870362 - 2875430 | 9.86   | 7.06   | 4.94  | transcription factor Dp, putative, expressed                          |
| LOC_Os03g05770 | 2878828 - 2880890 | 0.07   | 0.12   | 0.15  | peroxidase precursor, putative, expressed                             |
| LOC_Os03g05780 | 2887922 - 2883005 | 15.64  | 13.26  | 18.57 | 4-coumarate--CoA ligase-like 7, putative, expressed                   |
| LOC_Os03g05800 | 2900285 - 2897476 | 1.23   | 1.75   | 1.49  | expressed protein                                                     |
| LOC_Os03g05806 | 2901596 - 2906614 | 3.78   | 3.29   | 3.58  | pseudouridine synthase family protein, putative, expressed            |
| LOC_Os03g05812 | 2907108 - 2912670 | 15.52  | 18.48  | 15.45 | expressed protein                                                     |

---

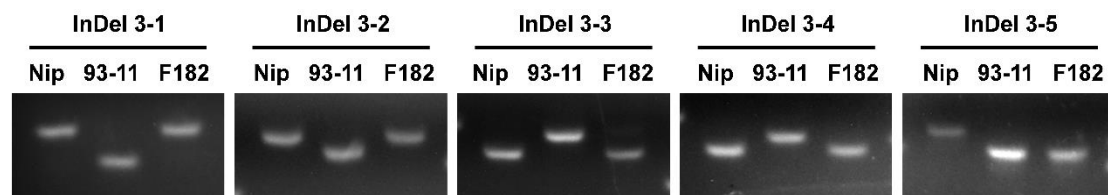

**Figure S1 InDel marker of *qPRR3***

Five available InDel markers in *qPRR3*. InDel 3-1 to InDel 3-4, F182 showed the genotype of Nip. InDel 3-5, F182 showed the genotype of 93-11.
